# Supplementary material for: CCL2/CCR2-mediated monocyte-macrophages infiltration drives methamphetamine-induced depressive-like behaviors
Source: Research Square preprint supplement (doi:10.21203/rs.3.rs-7742867/v1), 2025-11-17
Supplement: Supplementary file 1 [file 5cd0e3e5f2e3c76ab4bf5841.docx]

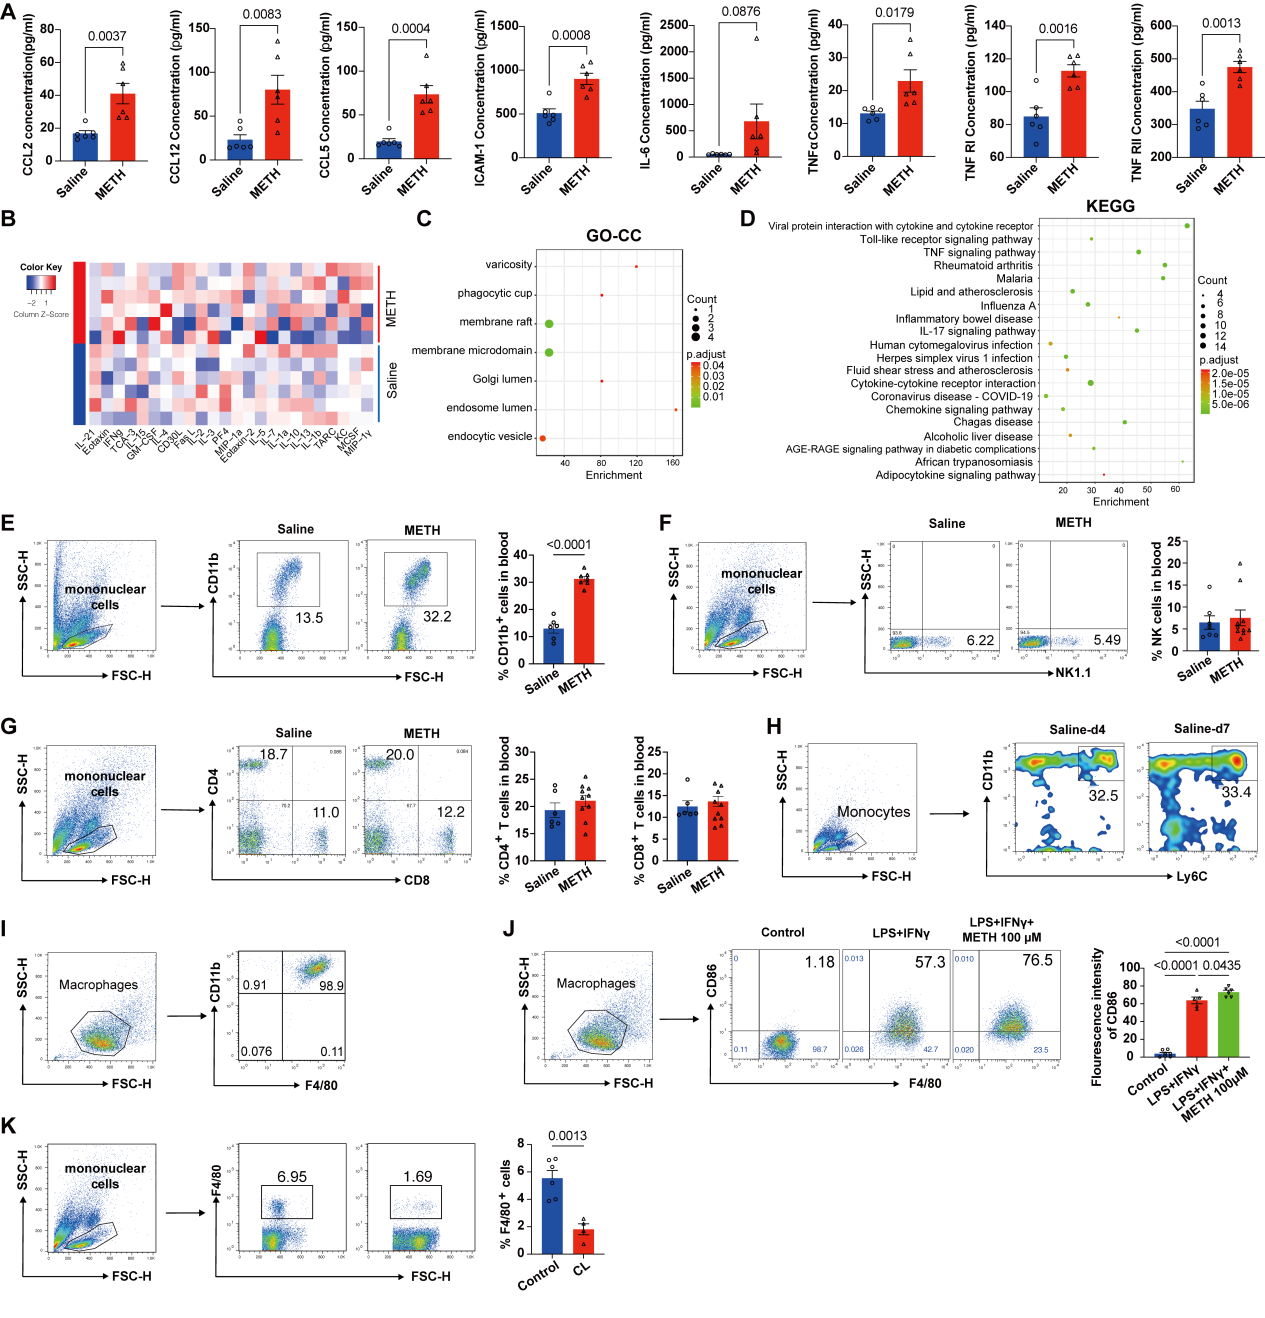


Supplementary Figure 1

A: Statistical graph showing elevated levels of CCL2, CCL12, CCL5, ICAM-1, IL-6, TNF, TNF RI and TNF RII in peripheral blood cytokine protein array analysis on day 4 of METH exposure (n=6). B: Cluster bar graph of cytokines with no statistically significant differences. C: Enrichment of peripheral cytokines and chemokines in GO-CC analysis after METH exposure. D: Enrichment of peripheral cytokines and chemokines in KEGG analysis after METH exposure. E: Gating strategy and the effect of METH treatment on the proportion of CD11b+ cells in mononuclear cells (n=6-7). F: Gating strategy and the effect of METH treatment on the proportion of NK1.1+ cells in mononuclear cells (n=7-10). G: Gating strategy and the effect of METH treatment on the proportion of CD4+ and CD8+ T cells in mononuclear cells (n=6-10). H: Gating strategy and representative flow cytometry image of CD11b+Ly6C+ labeled inflammatory monocytes in Saline group measured on the 4th and 7th days. I: Gating strategy for macrophages and a representative flow cytometry image of F4/80+CD11b+ macrophages proportion after M-CSF stimulation. J: Effect of METH treatment on the proportion of F4/80+CD86+ labeled M1 macrophages after LPS and IFN-γ stimulation (n=5-7). K: Flow cytometry analysis of the frequency of F4/80+ cells, which were pretreated with Clodronate Liposomes or Control Liposomes (n=4-6). Data are presented as mean ± SEM.


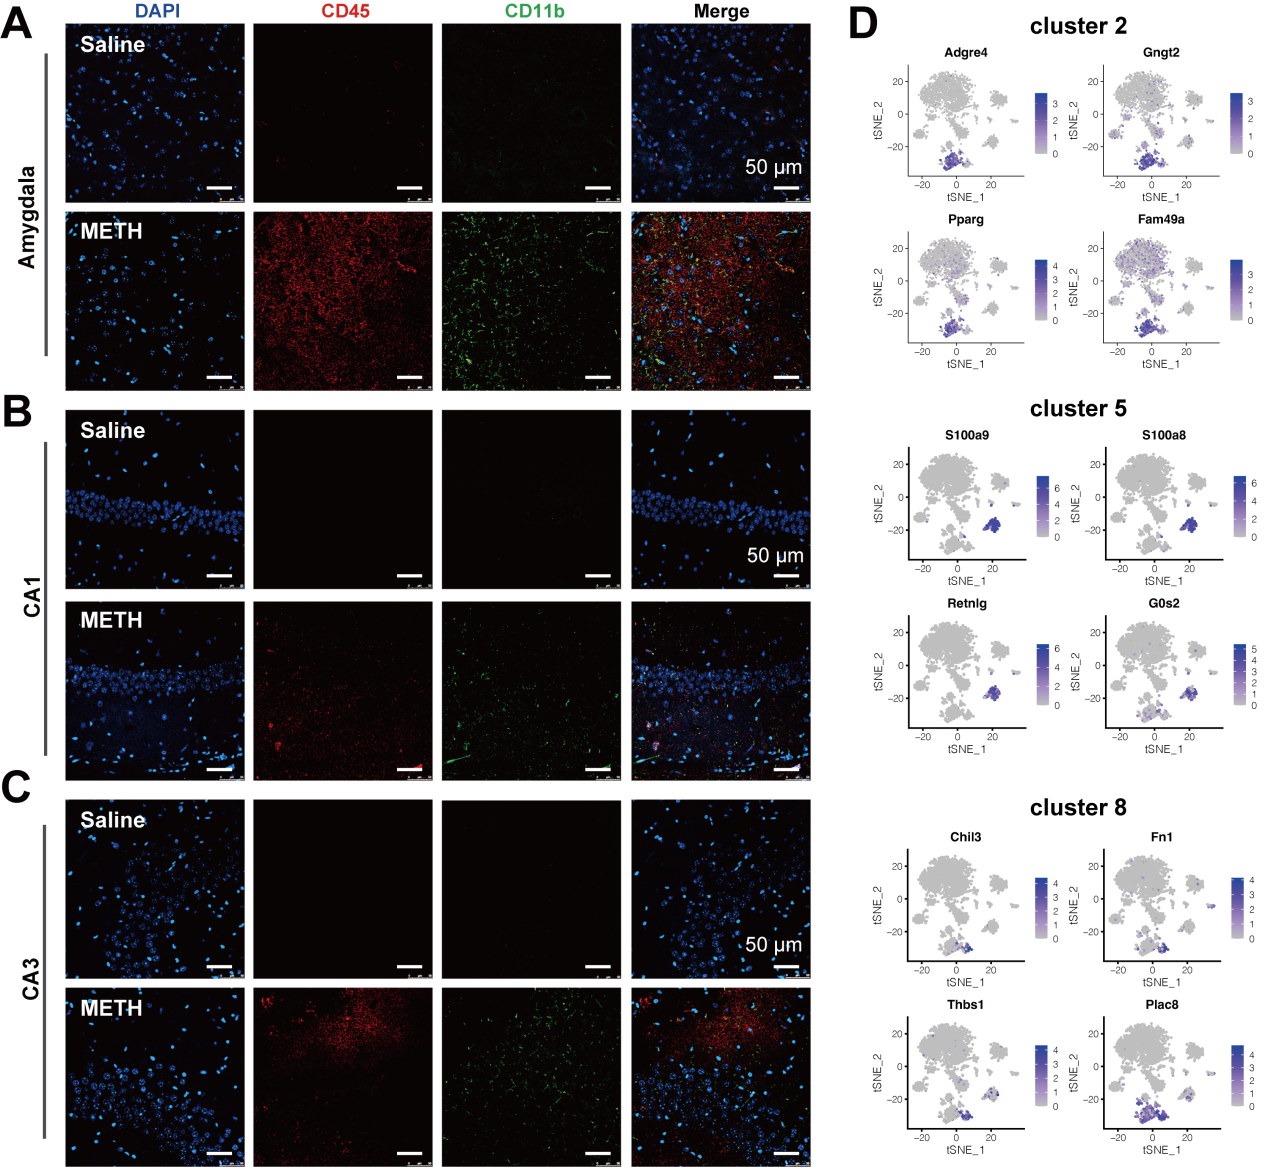


Supplementary Figure 2

Representative images of co-localized CD11b+CD45+ macrophages in the amygdala (A), hippocampal CA1 region (B) and CA3 region (C) at day 4 after METH exposure; scale bar = 50 μm. D: Visual t-SNE plot of highly expressed genes in subpopulations 2, 5, and 8 of macrophage.


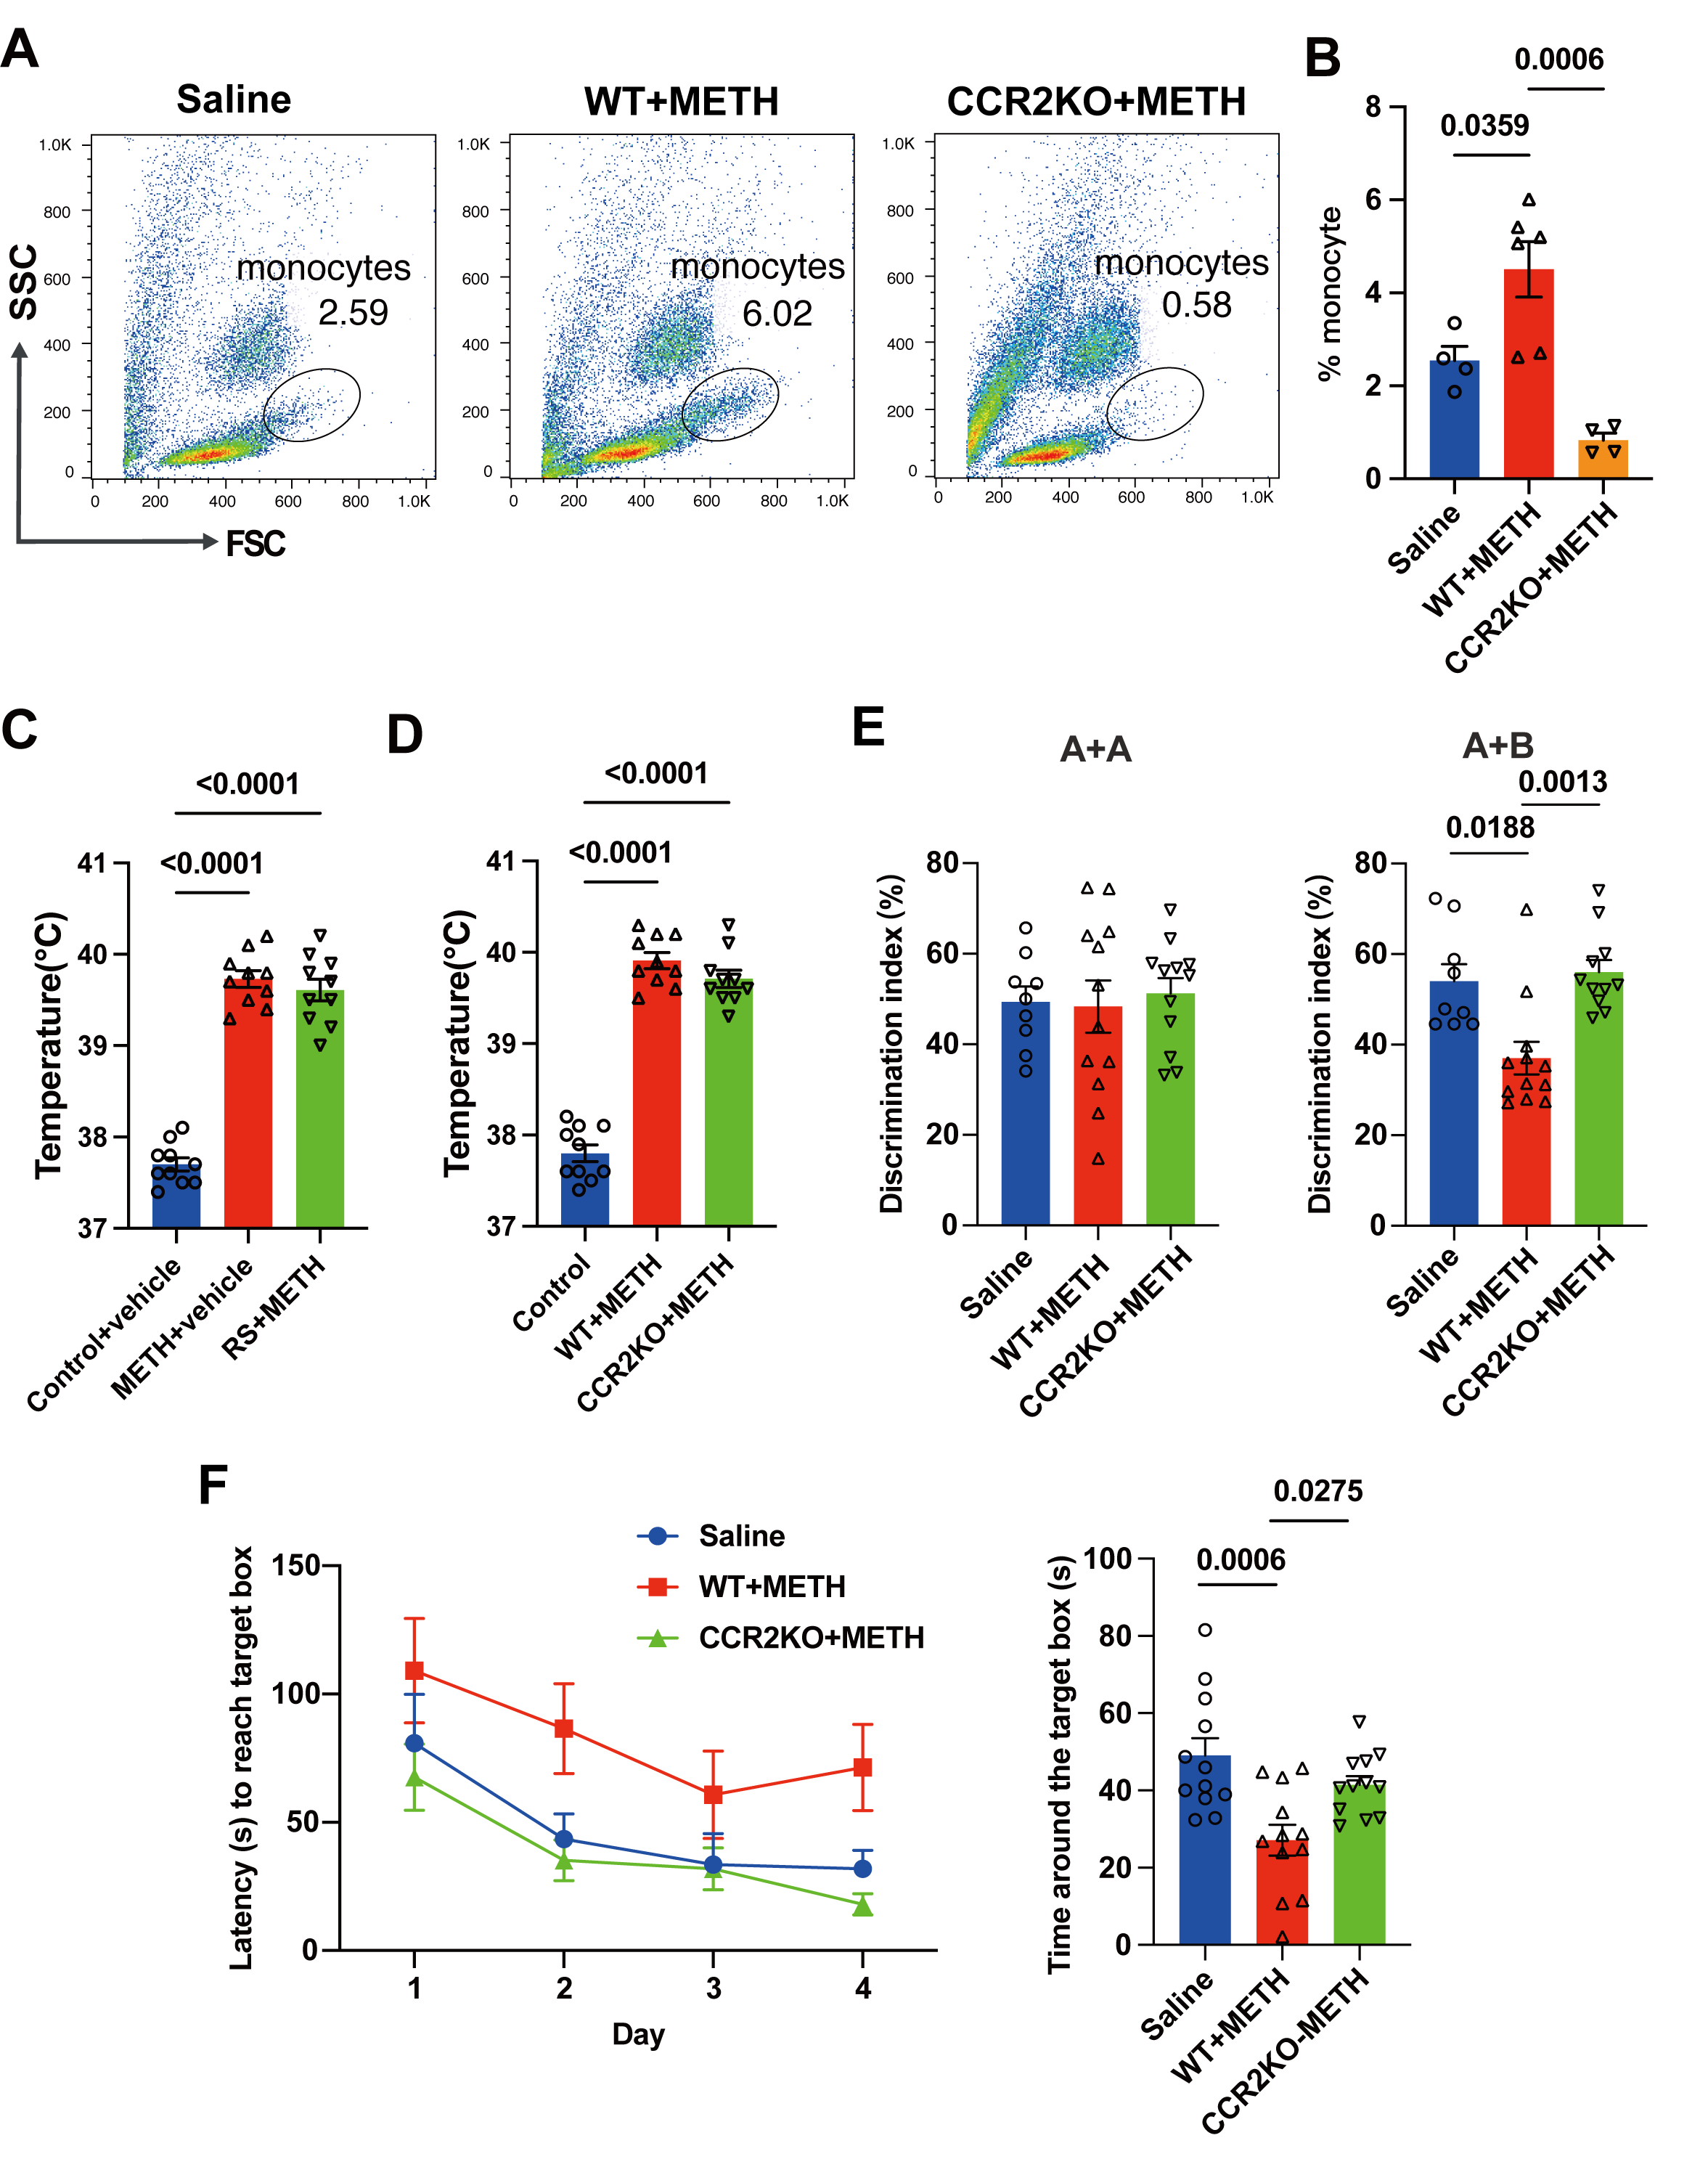
Supplementary Figure 3

A: In the saline control group, wild-type + METH-treated group (WT+METH group), and CCR2 knockout + METH-treated group (CCR2KO+METH group), monocytes in peripheral blood were gated based on cell diameter via forward scatter (FSC) signals and according to cell granularity using side scatter (SSC) signals. B: Bar Chart of Monocyte Percentages (n =4-6). C-D: Body temperature changes in mice following METH administration (n=10). E: Discrimination index in Novel object recognition in CCR2KO and WT mice (n = 9-12). F: Latency to reach target box and Time around the target box in Barnes maze test in CCR2KO and WT mice (n=12). Data are presented as mean±SEM.


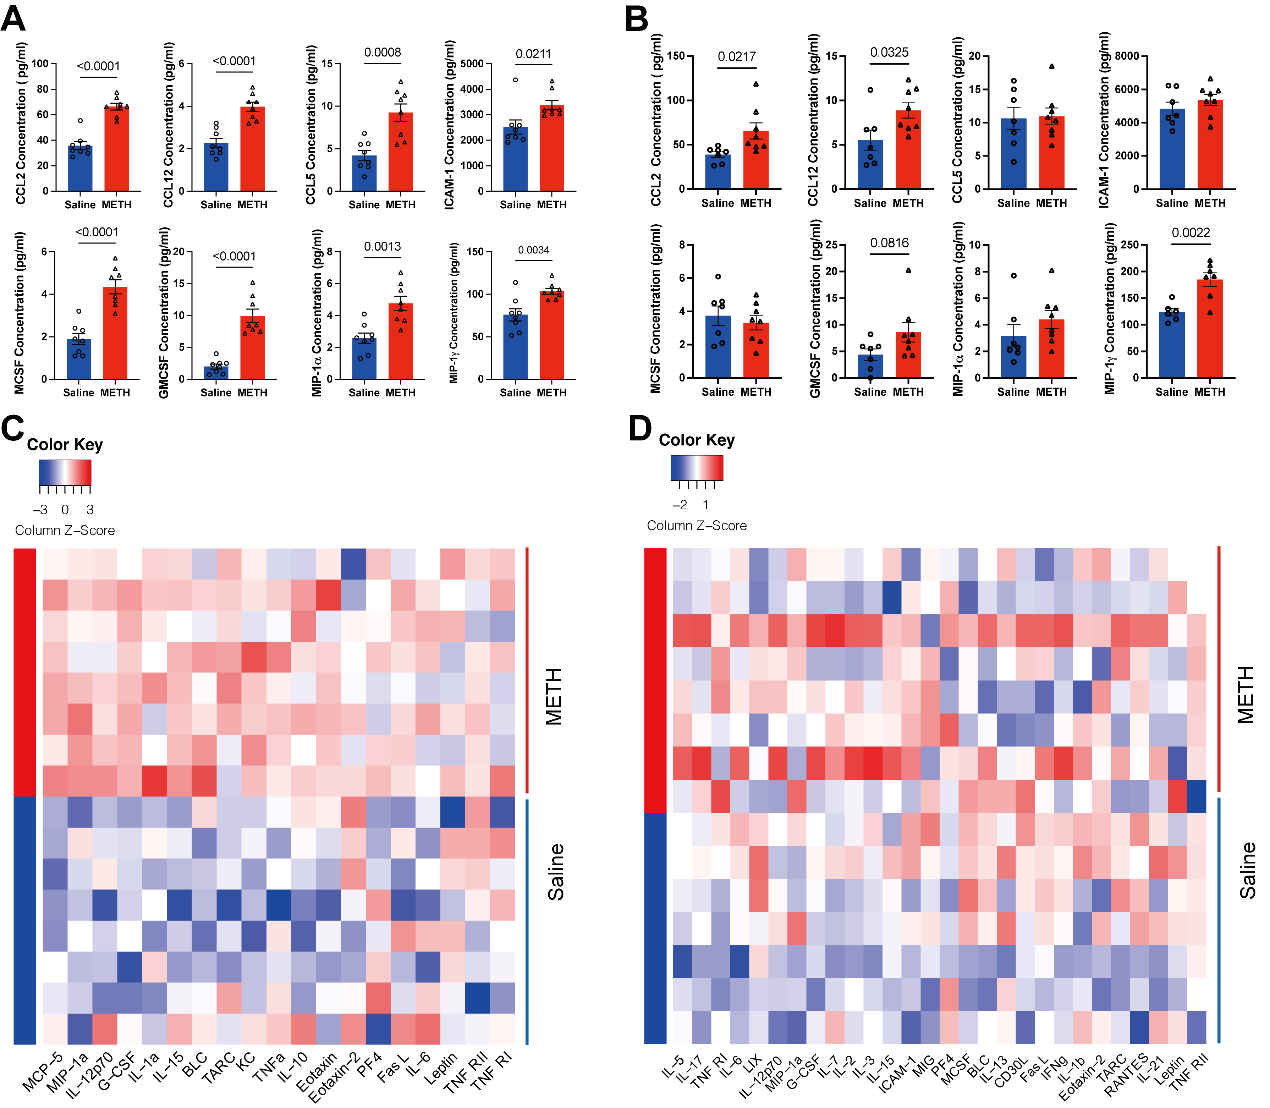


Supplementary Figure 4

A: Increased levels of chemokines in the choroid plexus caused by METH exposure. B: Increased levels of chemokines in the meninges caused by METH exposure. C: Cluster bar graph of cytokines in the choroid plexus with no statistically significant differences. D: Cluster bar graph of cytokines in the meninges with no statistically significant differences.


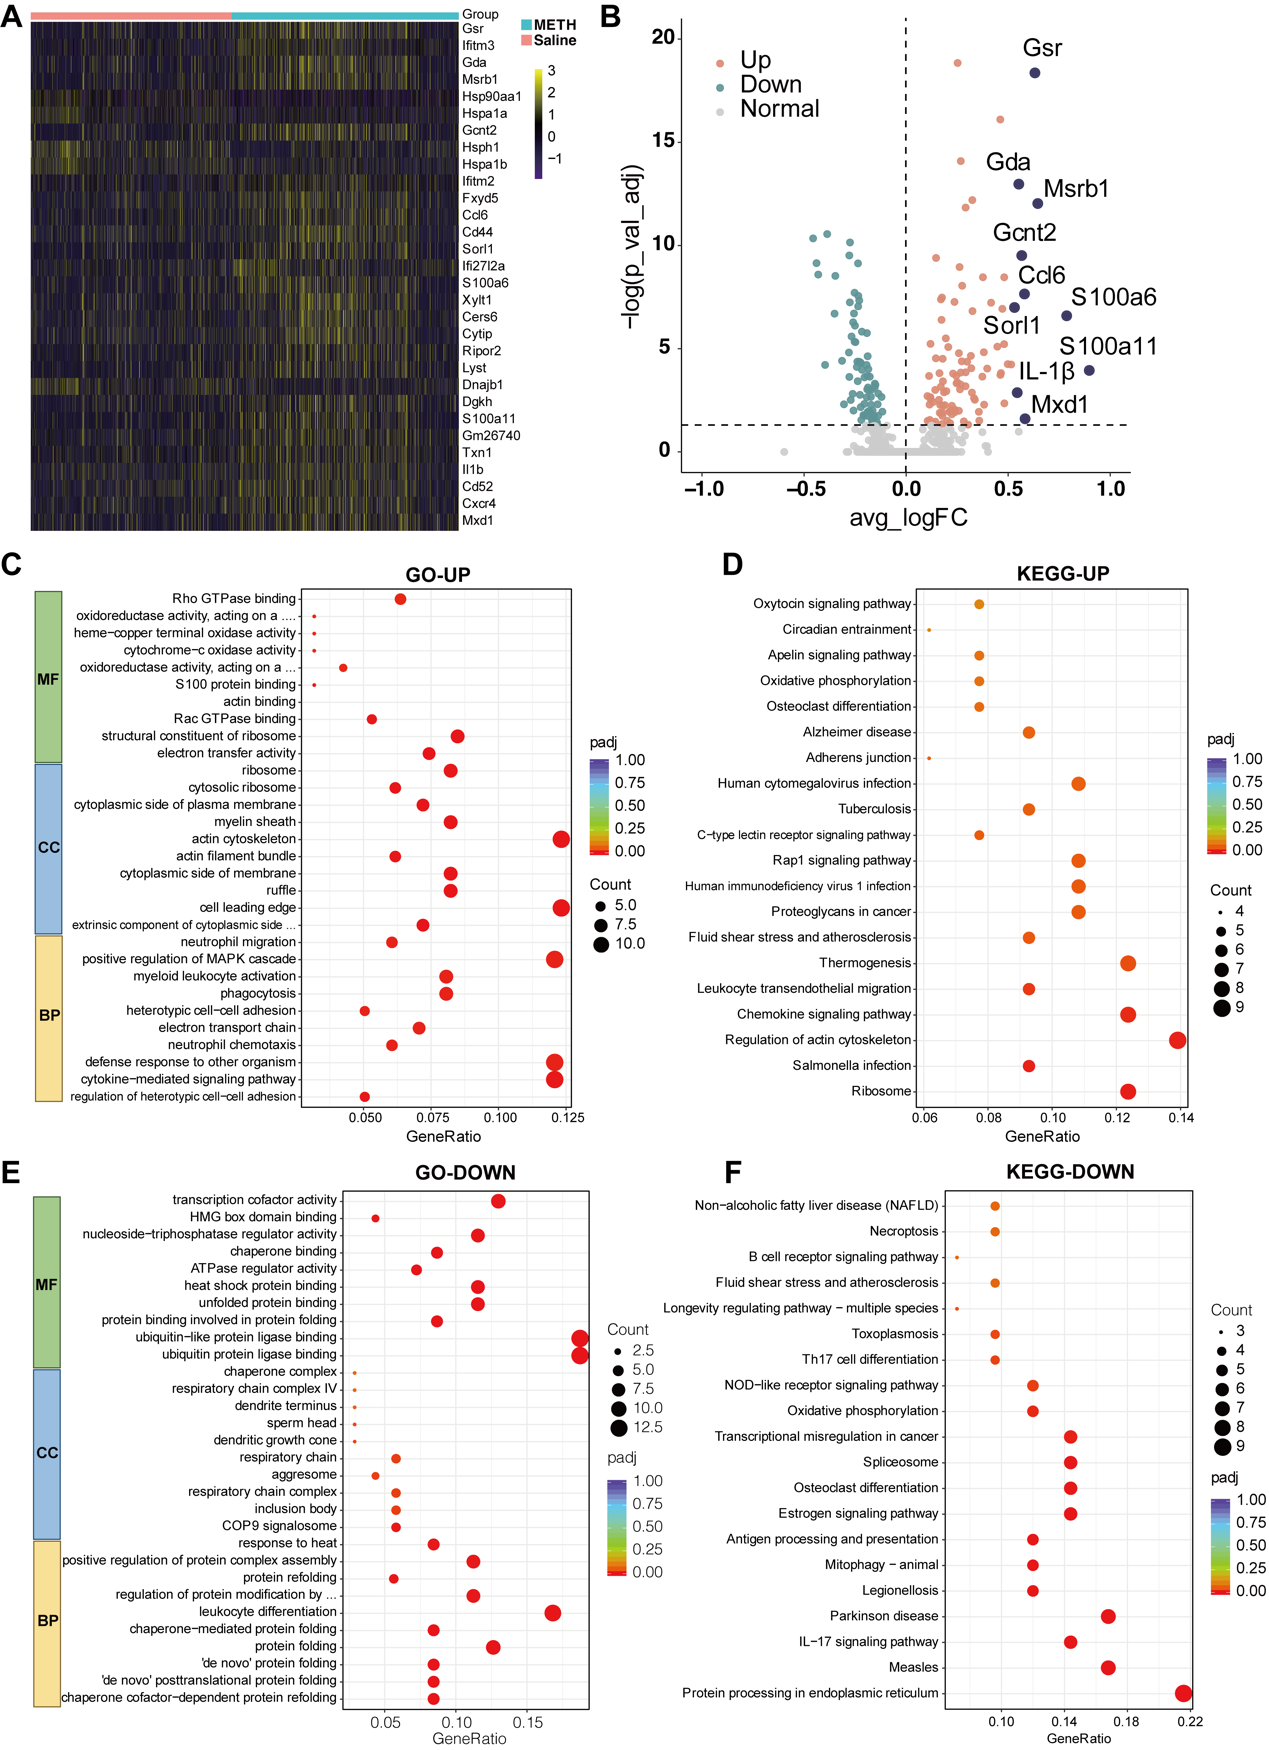


Supplementary Figure 5

A: Heat map of differential gene expression in macrophages; B: Volcano plot of differentially expressed genes (DEGs) in macrophages. C: GO analysis for up-regulated genes of macrophages. D: KEGG analysis for up-regulated genes of macrophages. E: GO analysis for down-regulated genes of macrophages. F: KEGG analysis for down-regulated genes of macrophages.


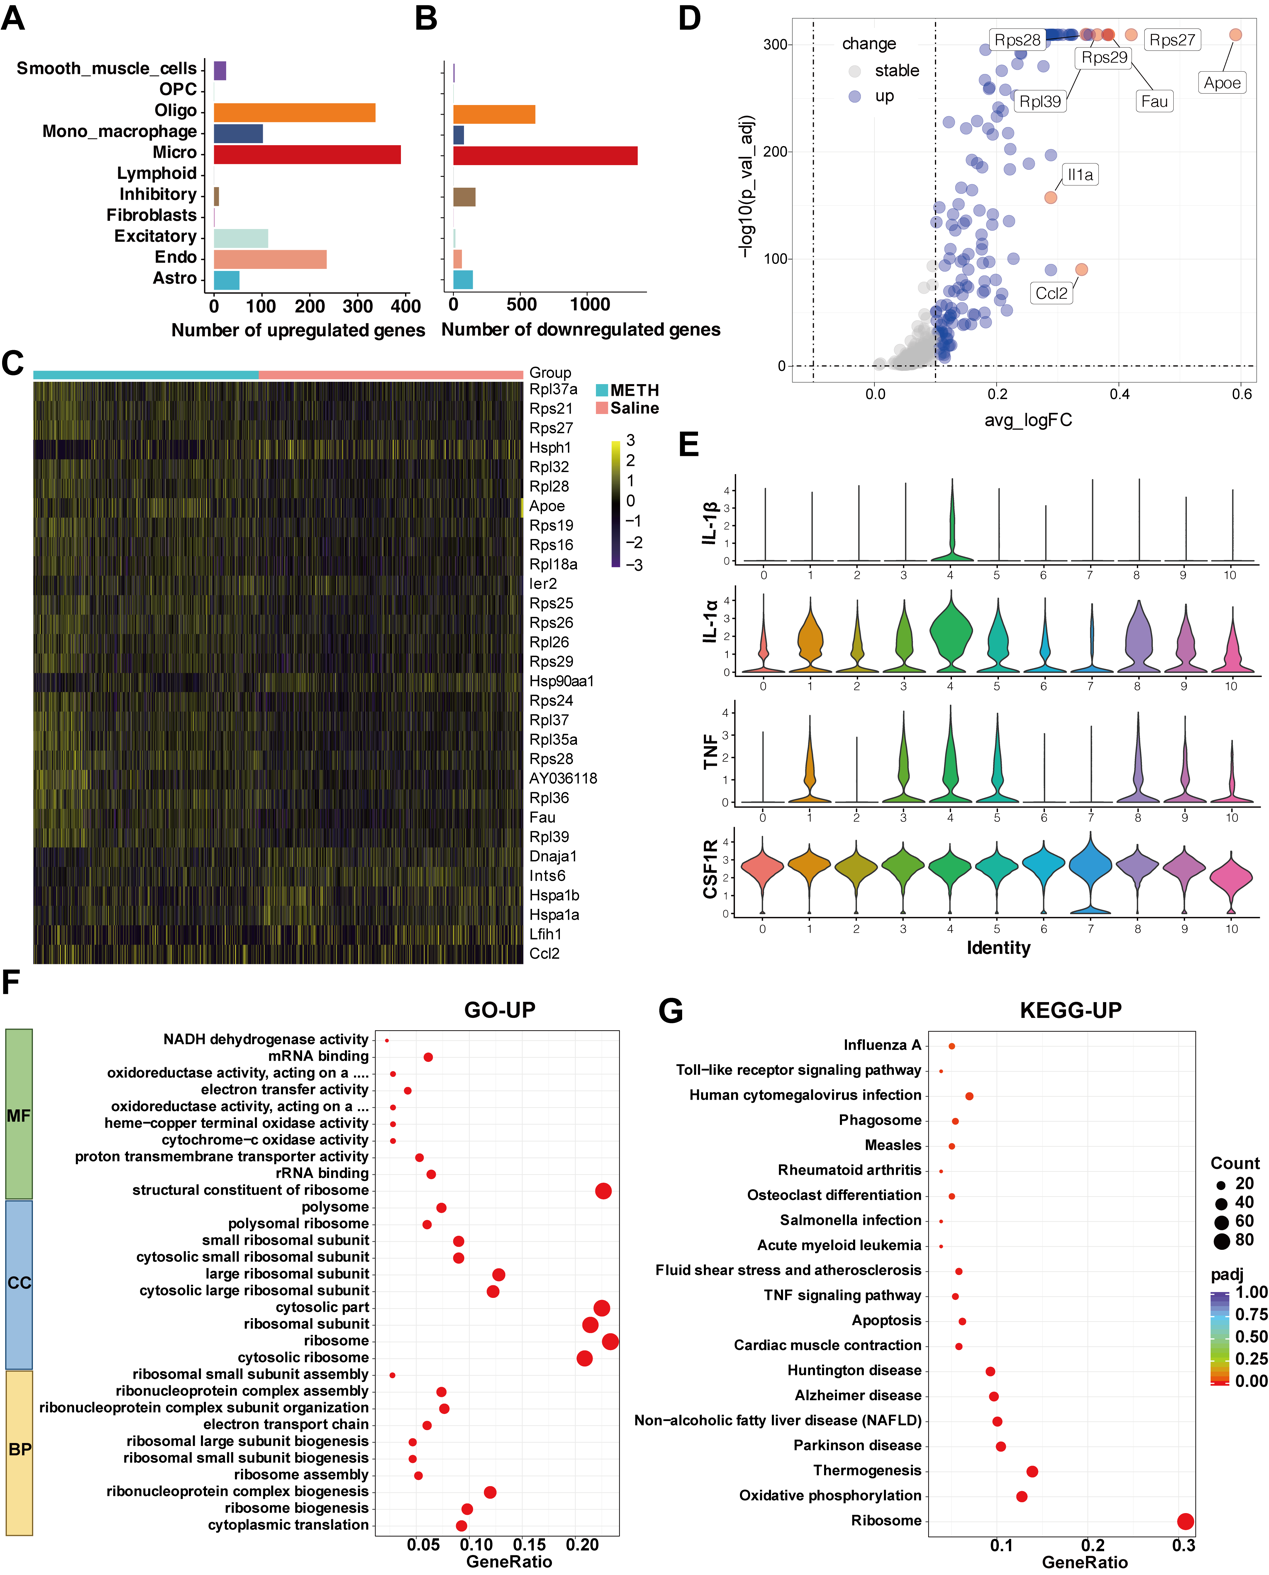


Supplementary Figure 6

A-B: scRNA-seq analysis showed significant changes in the number of differentially expressed genes (DEGs) in the mPFC following METH exposure. C: Heatmap of DEGs in microglia. D: Volcano plot of DEGs in microglia. E: Distribution characteristics of IL-1β, IL-1α, TNF and CSF1R in different clusters of microglia. F: GO analysis for up-regulated genes of macrophages. G: KEGG analysis for up-regulated genes of macrophages.
